# Supplementary material for: Cytokinin Confers Brown Planthopper Resistance by Elevating Jasmonic Acid Pathway in Rice
Source: MDPI journal article supplement (doi:10.3390/ijms23115946), 2022-05-25
Supplement: s1 [file s1]

## Supplementary Materials

# Cytokinin Confers Brown Planthopper Resistance by Elevating Jasmonic Acid Pathway in Rice

Xiao Zhang <sup>1,†</sup>, Daoming Liu <sup>1,†</sup>, Dong Gao <sup>1</sup>, Weining Zhao <sup>1</sup>, Huaying Du <sup>1</sup>, Zeyu Qiu <sup>1</sup>, Jie Huang <sup>1</sup>, Peizheng Wen <sup>1</sup>, Yongsheng Wang <sup>1</sup>, Qi Li <sup>1</sup>, Wenhui Wang <sup>1</sup>, Haosen Xu <sup>1</sup>, Jun He <sup>1</sup>, Yuqiang Liu <sup>1,\*</sup> and Jianmin Wan <sup>1,\*2</sup>

<sup>1</sup> State Key Laboratory for Crop Genetics & Germplasm Enhancement, Jiangsu Provincial Research Center of Plant Gene Editing Engineering, Nanjing Agricultural University, Weigang 1, Nanjing 210095, China; zxss25@163.com (X.Z.); liudm0924@163.com (D.L.); 2019101099@njau.edu.cn (D.G.); 2019101096@njau.edu.cn (W.Z.); 2019101098@njau.edu.cn (H.D.); qzy910525@163.com (Z.Q.); hj6751159@163.com (J.H.); 2017201048@njau.edu.cn (P.W.); 2017101098@njau.edu.cn (Y.W.); 2019201069@njau.edu.cn (Q.L.); zzyzwwh@163.com (W.W.); xuhaosen@126.com (H.X.); hj@njau.edu.cn (J.H.)

<sup>2</sup> National Key Facility for Crop Gene Resources and Genetic Improvement, Institute of Crop Science, Chinese Academy of Agricultural Sciences, Beijing 100081, China

\* Correspondence: yql@njau.edu.cn (Y.L.); wanjm@njau.edu.cn or wanjianmin@caas.cn (J.W.)

† These authors contributed equally to this work.

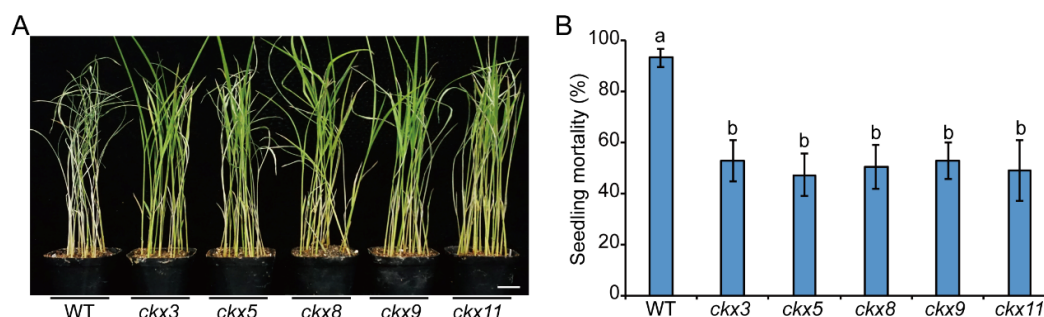

**Figure S1.** Knockout of *OsCKXs* significantly increases rice resistance to BPH. Representative image (A) and seedling mortality (B) of WT and *cckx* mutants. WT (Nipponbare) and *cckx* mutants at second-leaf stage were infested with BPH, and the seedling mortality of each was recorded seven days after BPH infestation. Data are means  $\pm$  SD,  $n = 3$ . Statistical significance was determined by one-way ANOVA with Tukey's test, different letters on the columns indicate significant differences at  $P < 0.05$ . Scale bar, 3 cm.

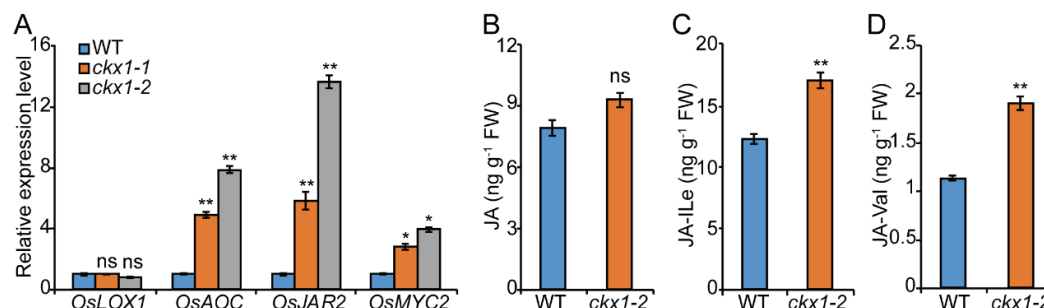

**Figure S2.** Expression analysis of JA pathway related genes and measurement of JA content in *cckx1* mutants. (A) Transcript analysis of JA pathway related genes in *cckx1*. The expression level of WT plant was set as 1. *Ubiquitin* (*Os03g0234350*) was used as an internal parameter. Levels of endogenous JA (B), JA-Ile (C) and JA-Val (D) in *cckx1* and WT. FW, fresh weight. Values are means  $\pm$  SD,  $n = 3$ . Two-tailed Student's *t*-test, \* $P < 0.05$ , \*\* $P < 0.01$ , ns, no significant difference.

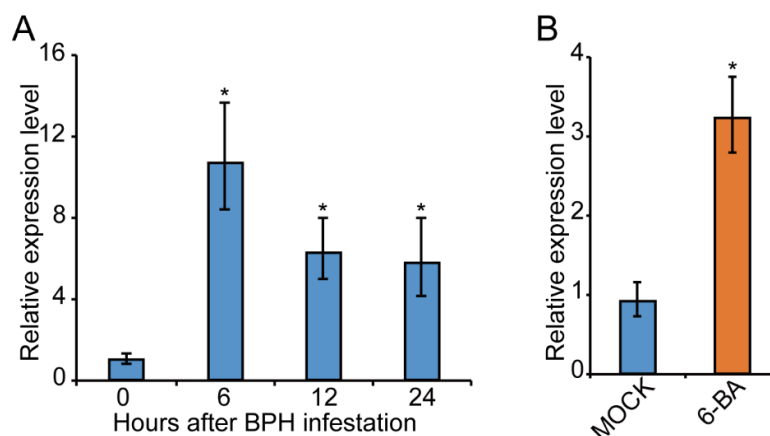

**Figure S3.** Influence of BPH attack and CK treatment on the transcript level of *OsOPR7*. (A) Effect of BPH infestation on the transcript level of *OsOPR7* in rice. The expression level of *OsOPR7* in plants without BPH infestation was set as 1. (B) Expression level of *OsOPR7* in rice seedlings treated with mock and 0.1 μM 6-BA. Results were presented relative to the value of mock-treated plant. *Ubiquitin* (*Os03g0234350*) was used as internal reference. Values are means ± SD, n = 3. Two-tailed Student's *t*-test, \**P* < 0.05.

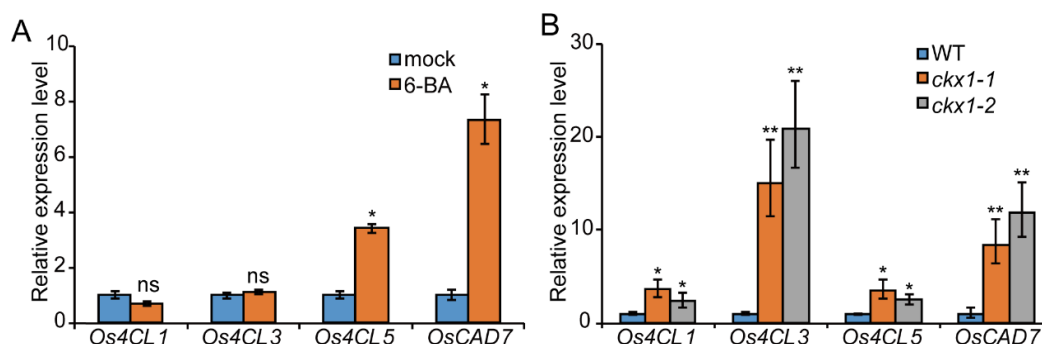

**Figure S4.** CK induces lignin pathway in rice. Transcript levels of lignin biosynthesis-related genes in rice sheaths from plants pretreated with mock or 0.1 μM 6-BA (A) and *cks1* mutant (B) post infestation with BPH for 24 h. The expression levels of mock-treated plant and WT were set as 1, respectively. *Ubiquitin* (*Os03g0234350*) was used as an internal reference. Two-tailed Student's *t*-test (values are means ± SD, n = 3), \**P* < 0.05, \*\**P* < 0.01, ns, no significant difference.

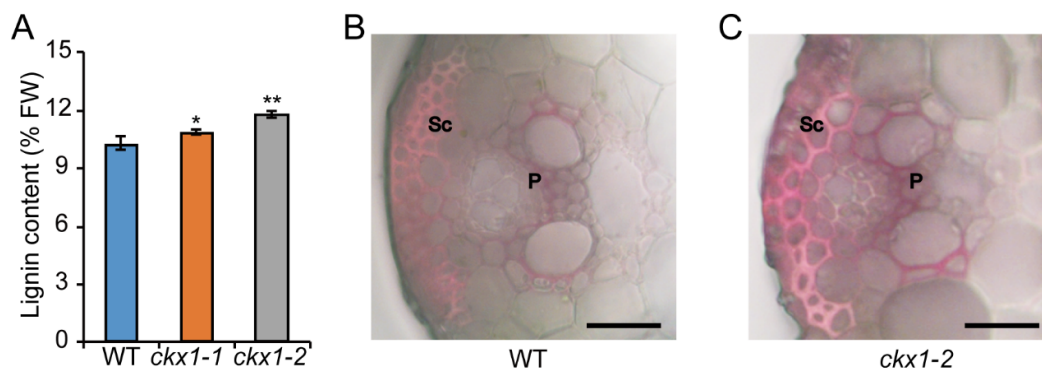

**Figure S5.** CK facilitates the accumulation of lignin in rice sheaths. (A) Quantification of lignin accumulation in fresh leaf sheaths of *cks1* and WT. FW, fresh weight. Values are mean ± SD of 3 biological replicates. Two-tailed Student's *t*-test, \**P* < 0.05, \*\**P* < 0.01. (B and C) Representative images of lignin accumulation showed by histochemical staining in fresh leaf sheaths of WT and *cks1*. Sc, sclerenchyma; P, phloem. Scale bar, 30 μm.

**Table S1.** List of primers used in this study.

| <b>Primers for qRT-PCR - CK metabolism</b>      |                          |                          |
|-------------------------------------------------|--------------------------|--------------------------|
| <b>Name</b>                                     | <b>Forward Primer</b>    | <b>Reverse Primer</b>    |
| <i>OsIPT1</i>                                   | TCCACCAAGCCCAAGGTTAT     | TCGGTGACCTTGTGTTGGTGAT   |
| <i>OsIPT2</i>                                   | TCATCGGACAGTCACCCAAG     | CACCTGGATCTTGTTCGGAGT    |
| <i>OsIPT3</i>                                   | TCTGCATGGAGGAGGGAATG     | CCGCAACCTCCATCTTCTCT     |
| <i>OsIPT4</i>                                   | GTACGAGTGCTGCTTCCTCTG    | CCAGATGCCCCCTGGAGTAGT    |
| <i>OsIPT5</i>                                   | CAGCGTCAGCAGGAGCAT       | CGCGGCCGTGAACTCC         |
| <i>OsIPT6</i>                                   | GATCGATGCGGCATATCTCATC   | CCTCCAATTGCCCAAAGGATC    |
| <i>OsIPT7</i>                                   | GGATACGAGGATGGTGGTGA     | TCGATGGACAGCTTGGTCTT     |
| <i>OsIPT8</i>                                   | AGACCAAGCTTTCCATCGAC     | CAGCTGAATCTTGTTCAGCGT    |
| <i>OsIPT9</i>                                   | TTGTGAGGCCTGTGATAAC      | GCTTGTGTGCTCCCACT        |
| <i>OsIPT10</i>                                  | GCCATTGCGCAGTTTATC       | CACGGAACACCCTGTTCT       |
| <i>OsCKX1</i>                                   | GGAGGAGGAGGTGTTCTACG     | GAGGTGCGAGAACCTCAGTA     |
| <i>OsCKX2</i>                                   | ACACTGACACACACAAACCG     | CAGTTGAGCATGAGGAGCAC     |
| <i>OsCKX3</i>                                   | GGACAGCATCTCACCAGGATA    | GTCCCACTTGTGTCTGAGGA     |
| <i>OsCKX4</i>                                   | TTGAGACCTTCACCGAGGAC     | TGAGGATGCCTGTCCTGTTT     |
| <i>OsCKX5</i>                                   | AAAGGAGAGGTGGTGACCTG     | GGTGAACCTCGGTGAAGTTGG    |
| <i>OsCKX6</i>                                   | GTGACCTTCACCAGAGACCA     | TGTCCGATTGAGCTGGACTT     |
| <i>OsCKX7</i>                                   | GGCCACGTTCACTAAAGACC     | TCGCTGCTAGAGAAGAAGGG     |
| <i>OsCKX8</i>                                   | TGAAGCTGGTTTCAGCGAAG     | GCTTTGGCACGAACACATTG     |
| <i>OsCKX9</i>                                   | CCTGGCGTATCACCTATGT      | CTCCTGCATTGACAGTGTG      |
| <i>OsCKX10</i>                                  | TCGGACTTTGGCCATATTGT     | GTGATAAGCGGATTAGGGCA     |
| <i>OsCKX11</i>                                  | CGTGGCTCAACCTCTTCATC     | CACCTGGACTTGAGCATGGG     |
| <i>OsUBQ</i>                                    | AACCAGCTGAGGCCCAAGA      | CGATTGATTAAACCAGTCCATG   |
| <b>Primers for qRT-PCR - CK signaling</b>       |                          |                          |
| <i>OsORR1</i>                                   | GCTCACTGGGAGGACTTGAT     | CTGCAGCAAGCCGTAAAGAT     |
| <i>OsORR2</i>                                   | ACCTTCTGCTGCTCTTCCAT     | CTTCCAAGCAATGGCCAAC      |
| <i>OsORR3</i>                                   | GGGACAAGGTTTGGCAACAT     | TCCCAGAAAGGATGGTGGAC     |
| <i>OsORR4</i>                                   | CACTGCAACCTCTTGAGTCG     | GGTGGCTTGCAGCATGTTAT     |
| <i>OsORR5</i>                                   | GTGCAGTCAAATGGTGGGTT     | CAGTTTGCAAGGTCCGGA       |
| <i>OsORR6</i>                                   | TCAGGACAGGAAGCCATCAG     | TAGGTCACAGCGTTCATGGT     |
| <i>OsRR1</i>                                    | GGCGAAACTGGGCAATAG       | GCCTCCACAAGGAGATGATACT   |
| <i>OsRR2</i>                                    | ATTTTGCTGAGAGAGAAAAGA    | ACGACACCAGATGCCCACTC     |
| <i>OsRR3</i>                                    | CGCAGCTCCAAATATCGAGTT    | CACATTCCGATCCAGGCTGAG    |
| <i>OsRR5</i>                                    | ACTACTGGATGCCGGAGATG     | CTCCGAGGACATGATCACC      |
| <i>OsRR6</i>                                    | CACAATGTTGAAATGGCACCA    | AATTAATGTCAAACTCTGACC    |
| <b>Primers for qRT-PCR – JA and SA pathways</b> |                          |                          |
| <i>OsLOX1</i>                                   | GTACGCTGGGTTACAGCTC      | TCAGATGGATGTGCTGTTGG     |
| <i>OsAOC</i>                                    | CGTACCTGACCTACGAGGAG     | GCCCTTGAGGTAGAAGGTGT     |
| <i>OsJAR2</i>                                   | AGAAGGTTCTCCGCCACTAC     | CGGAGCTGAAGAAGACGTTG     |
| <i>OsJamyb</i>                                  | GAGGACCAGAGTGCAAAAGC     | CATGGCATCCTTGAACCTCT     |
| <i>OsMYC2</i>                                   | AGCTCAACCAGCGCTTCTAC     | CCTTCTTGAGCGACTCCATC     |
| <i>OsICS1</i>                                   | TATGGTGCTATCCGCTTCGAT    | CGAGAACCAGCTCTCTTCAA     |
| <i>OsPAL2</i>                                   | AGCTGGTCAACGAGTTCTACA    | GAGGGAGTTGACGTCTGTT      |
| <i>OsPAL8</i>                                   | GTGACGAATGTCGCCAAGAA     | ATGAGTGGAAGCTGGATCT      |
| <i>OsNH1</i>                                    | TTTCCGATGGAGGCAAGAG      | GCTGTCTATCCGAGCTAAGTGT   |
| <i>OsWRKY45</i>                                 | TTCTTGTTGATGTGCTGCTC     | CCCCAGCTCATAATCAAGAAC    |
| <b>Primers for CRISPR</b>                       |                          |                          |
| CR-CKX1-F                                       | GGCAGCGTCAGCGGGCAGACTTAC | AAACGTAAGTCTGCCCGCTGACGC |
